# Supplementary material for: Boosting the oxygen evolution reaction in non-precious catalysts by structural and electronic engineering
Source: Royal Society of Chemistry journal article supplement (doi:10.1039/c8ta02542h), 2018-01-01
Supplement: c8ta02542h1.pdf [file c8ta02542h1.pdf]

## Electronic Supplementary Information

# Boosting Oxygen Evolution Reaction in Non-Precious Catalyst by Structural and Electronic Engineering

*Guoge Zhang<sup>ab\*</sup>, Junyi Yuan<sup>a</sup>, Yan Liu<sup>b</sup>, Wei Lu<sup>c</sup>, Nianqing Fu<sup>a</sup>, Wenfang Li<sup>a</sup> and*

*Haitao Huang<sup>b\*</sup>*

*a* School of Materials Science and Engineering, South China University of Technology, Guangzhou, P. R. China.

*b* Department of Applied Physics, The Hong Kong Polytechnic University, Hong Kong.

*c* University Research Facility in Materials Characterization and Device Fabrication, The Hong Kong Polytechnic University, Hong Kong.

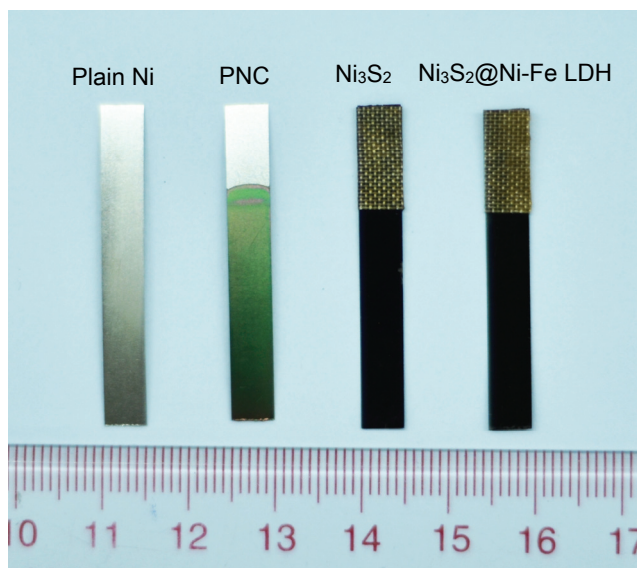

**Fig. S1.** Optical image of plain nickel, anodic nickel (PNC), Ni<sub>3</sub>S<sub>2</sub> nanorods and Ni<sub>3</sub>S<sub>2</sub> nanorod@Ni-Fe LDH nanofilm

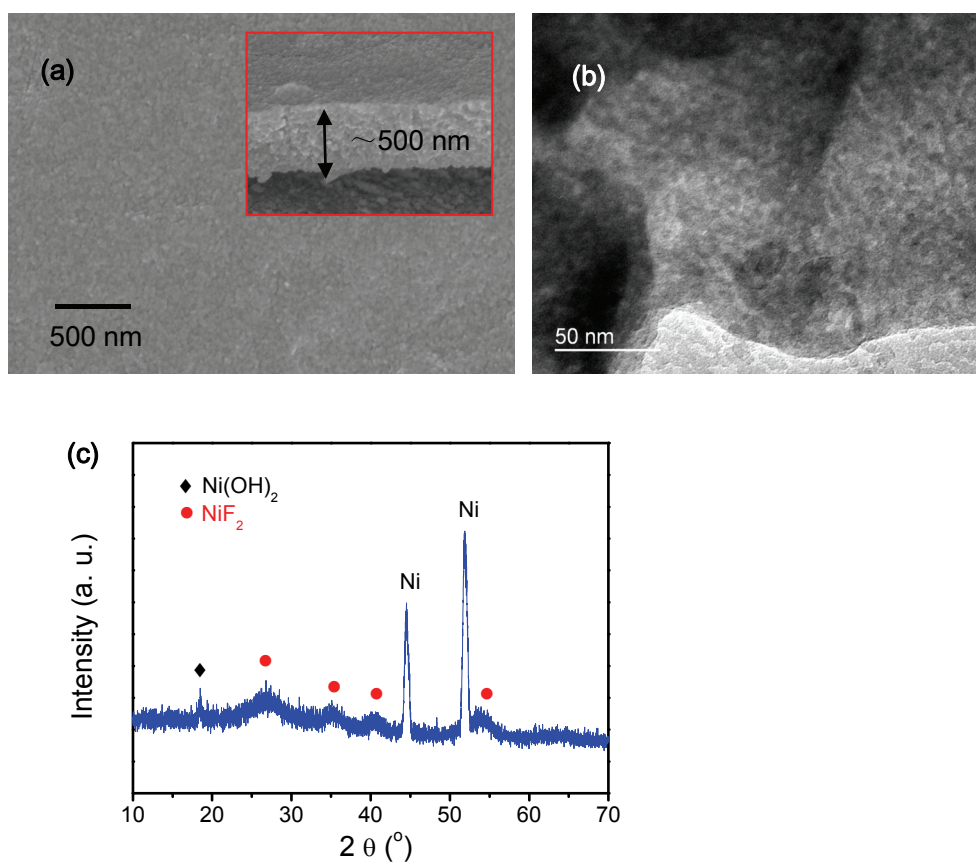

**Fig. S2.** (a) SEM, (b) TEM and (c) XRD of PNC

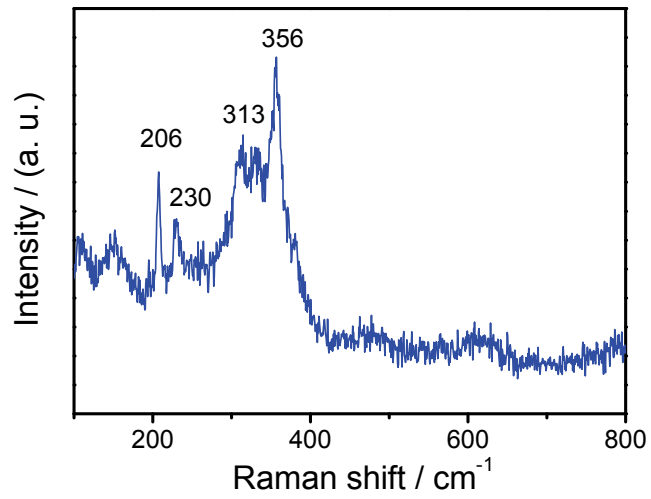

**Fig. S3.** Raman spectrum of vertically aligned Ni<sub>3</sub>S<sub>2</sub> nanorods.

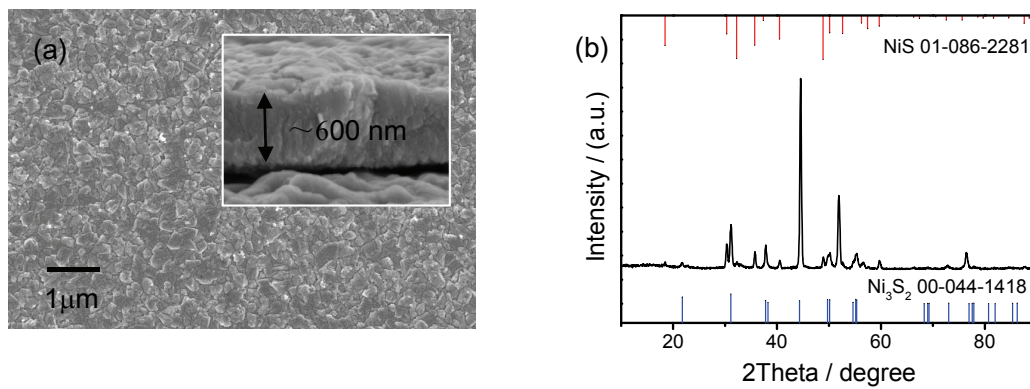

**Fig. S4.** (a) SEM and (b) XRD of plain nickel subject to sulfidization without additional nickel salts.

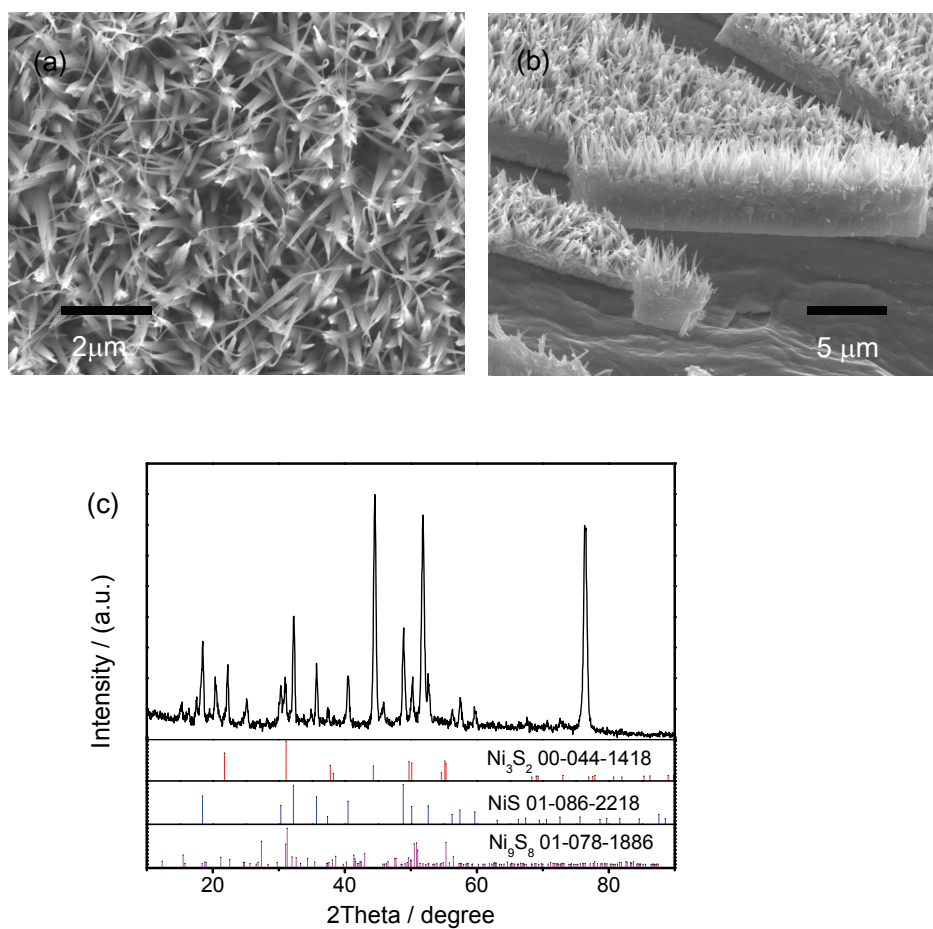

**Fig. S5.** (a) Top view and (b) cross section view SEM images, and (c) XRD of Ni<sub>3</sub>S<sub>2</sub> nanowire obtained from sulfidization of plain nickel with additional nickel salts.

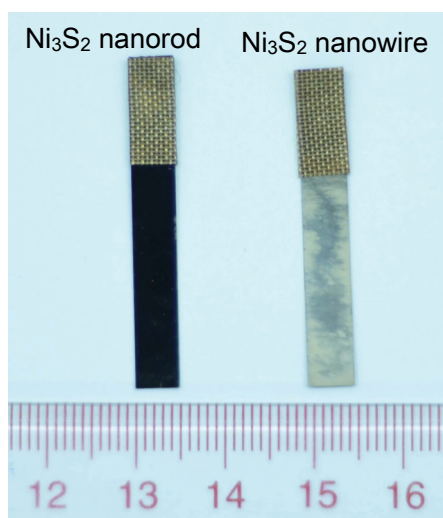

**Fig. S6.** Optical image of the sample after 10 min ultrasonic treatment in deionized water.

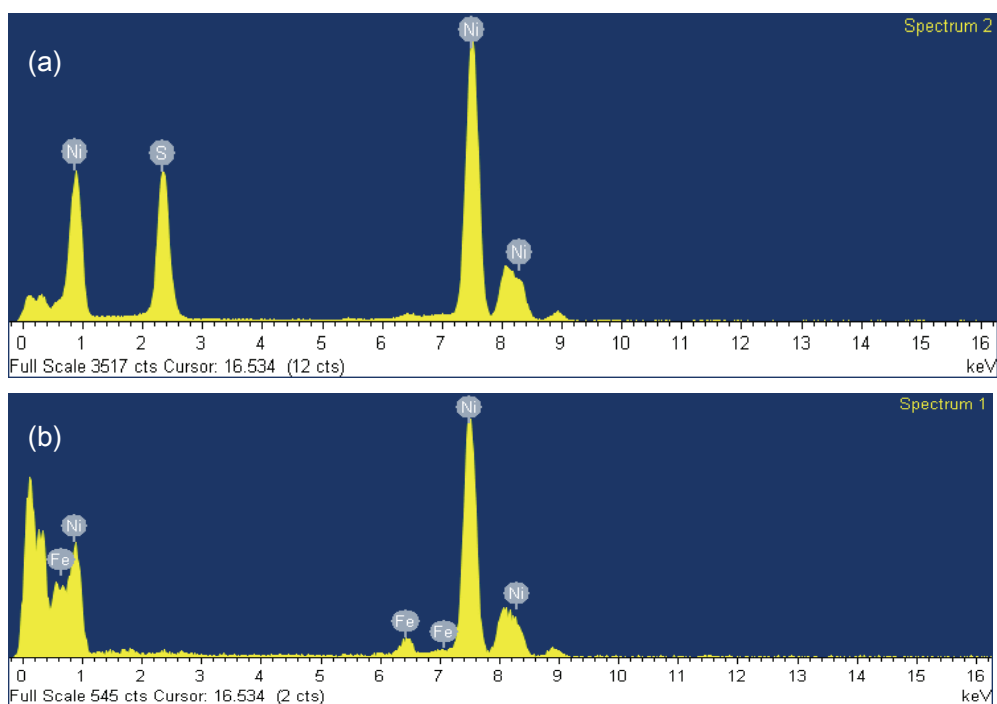

**Fig. S7.** The energy dispersive X-ray spectroscopy (EDX) of (a) Ni<sub>3</sub>S<sub>2</sub> nanorod and (b) Ni-Fe LDH nanofilm.

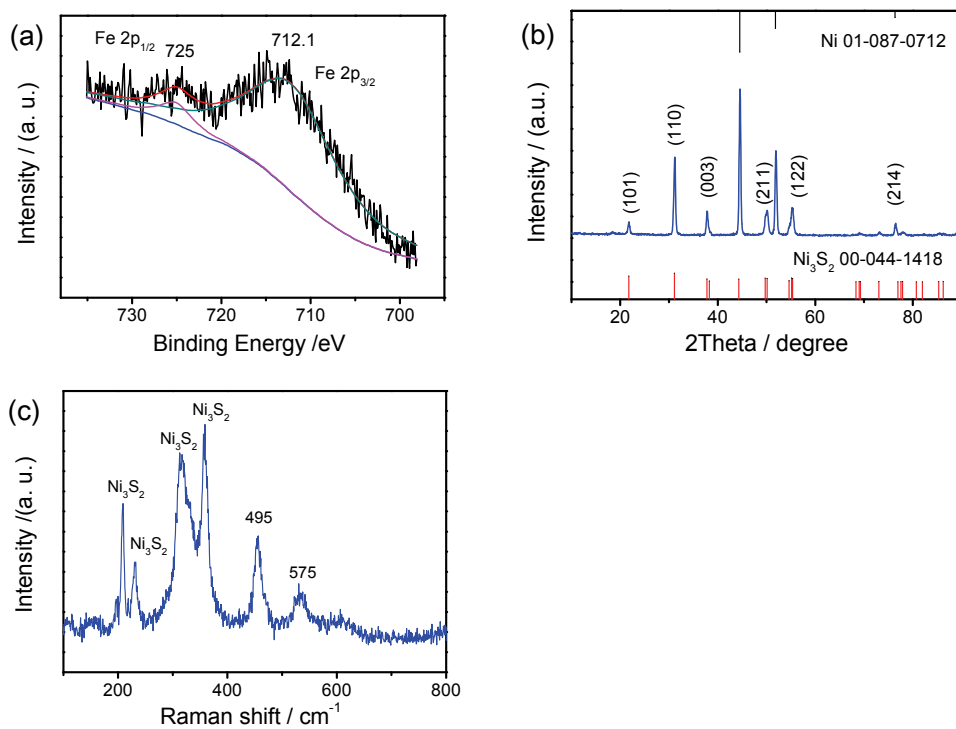

**Fig. S8.** (a) Fe 2p XPS, (b) XRD and (c) Raman spectra of Ni<sub>3</sub>S<sub>2</sub> nanorod@Ni-Fe LDH nanofilm.

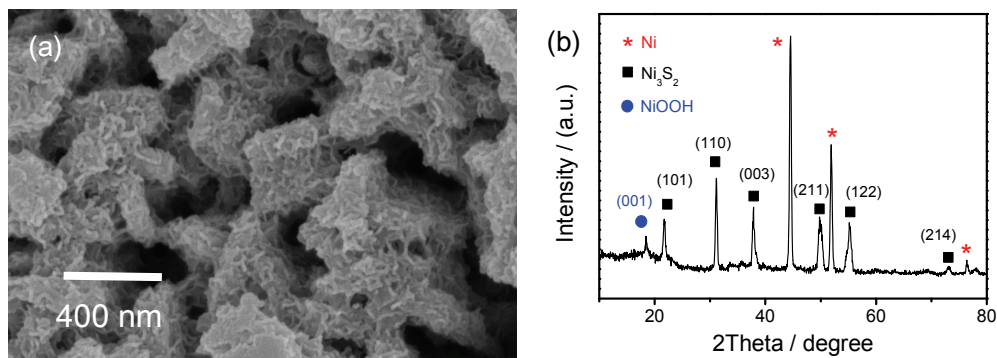

**Fig. S9.** (a) SEM image and (b) XRD of Ni<sub>3</sub>S<sub>2</sub>@Ni-Fe LDH after 40 hours' water electrolysis.

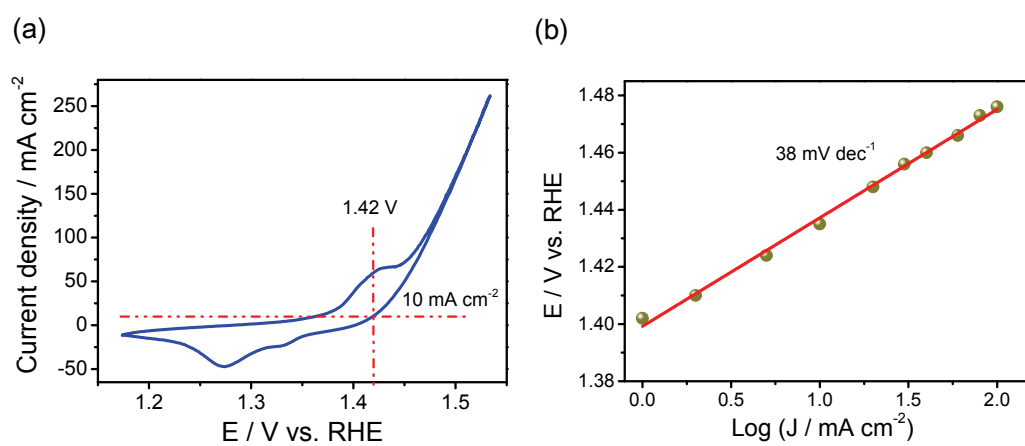

**Fig. S10.** (a) CV and (b) Tafel plot of Ni<sub>3</sub>S<sub>2</sub>@Ni-Fe LDH prepared on nickel foam in 1M KOH. CV Scan rate: 1 mV s<sup>-1</sup>.

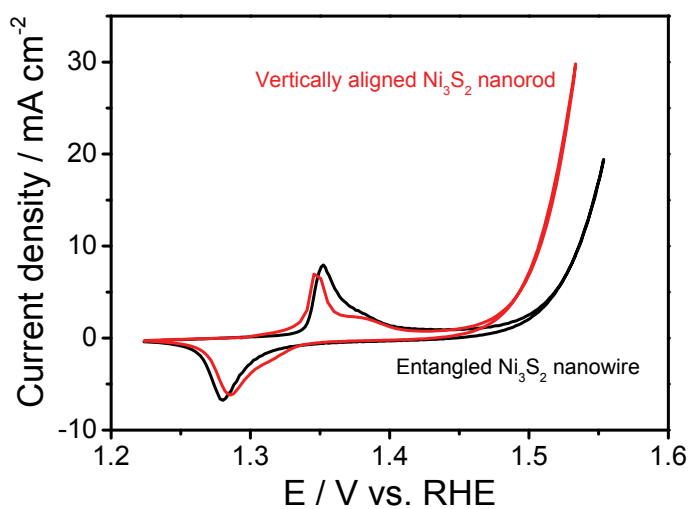

**Fig. S11.** CV plot of two kinds of  $\text{Ni}_3\text{S}_2$  in 1M KOH. Scan rate:  $1 \text{ mV s}^{-1}$ .

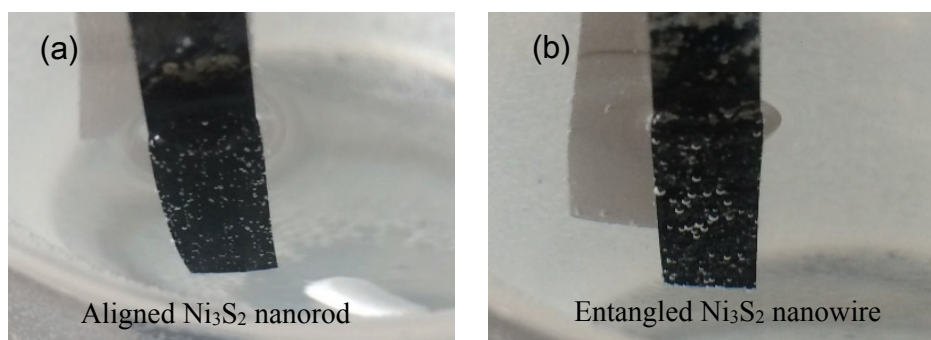

**Fig. S12.** Optical image of water electrocatalysis at the current density of  $10 \text{ mA cm}^{-2}$ , (a) aligned  $\text{Ni}_3\text{S}_2$  nanorods and (b) entangled  $\text{Ni}_3\text{S}_2$  nanowires. Electrolyte: 1 M KOH.

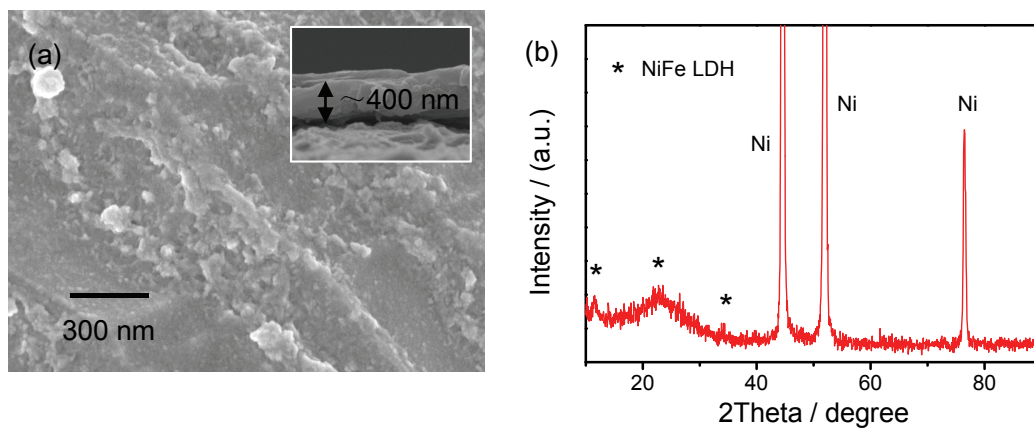

**Fig. S13.** (a) SEM and (b) XRD of  $\text{Ni@Ni-Fe LDH}$ .

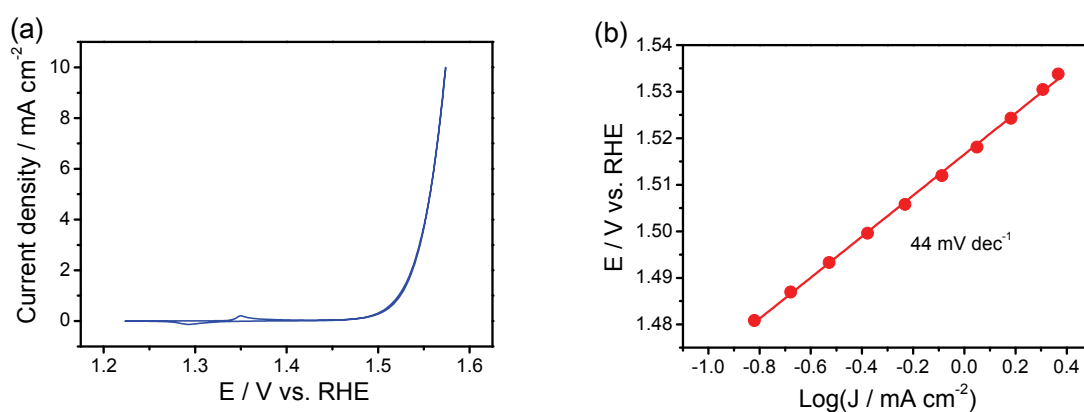

**Fig. S14.** (a) CV and (b) Tafel plot of Ni@Ni-Fe LDH in 1M KOH. CV Scan rate:  $1 \text{ mV s}^{-1}$ .

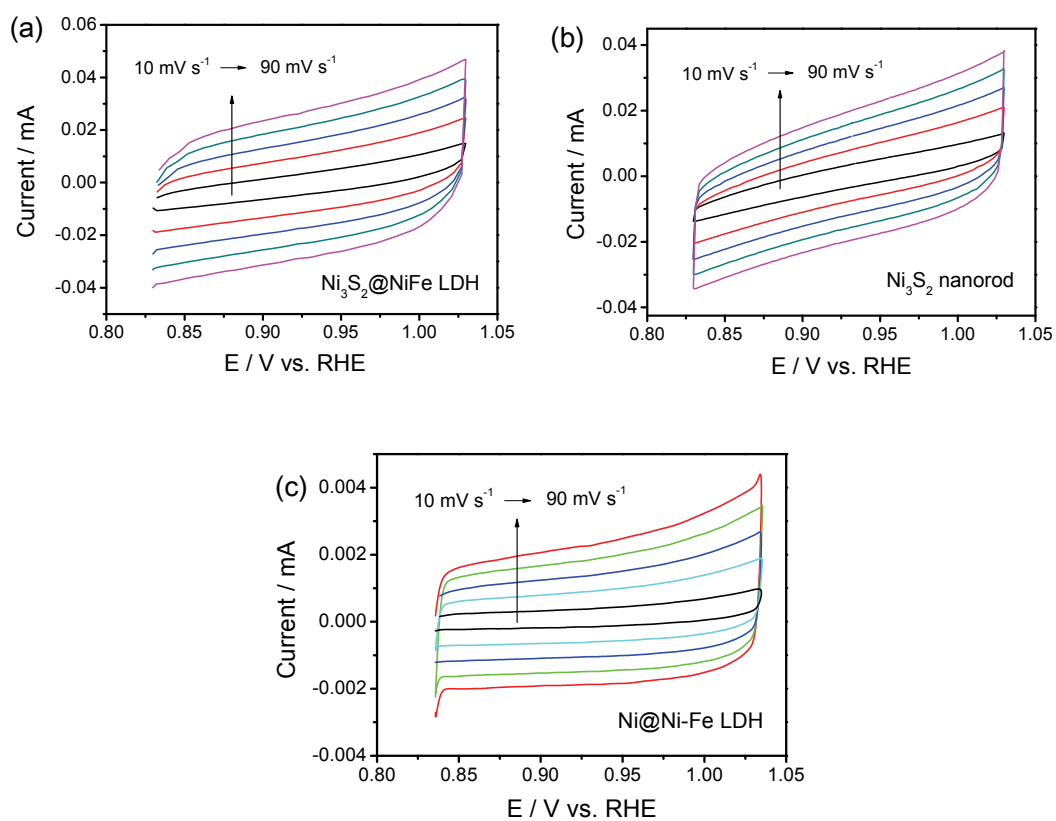

**Fig. S15.** The variation of scan rate with current density in the potential range where no Faradaic processes occur. (a)  $\text{Ni}_3\text{S}_2$  nanorods, (b)  $\text{Ni}_3\text{S}_2@/\text{Ni-Fe LDH}$ , (c) Ni@Ni-Fe LDH.



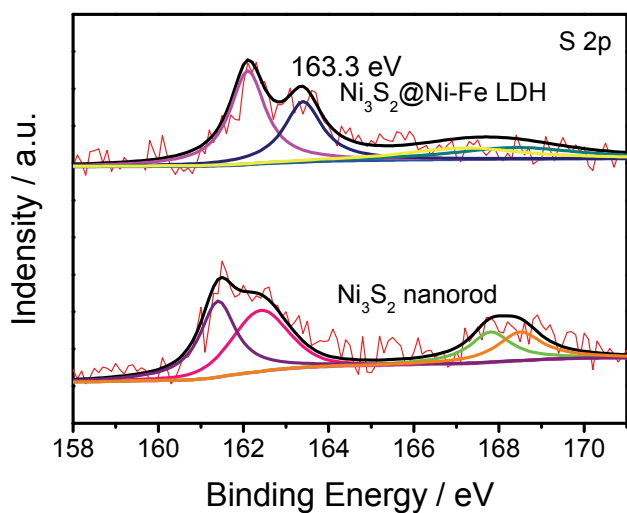

**Fig. S16.** S 2p XPS spectra of  $\text{Ni}_3\text{S}_2@\text{Ni-Fe LDH}$  and  $\text{Ni}_3\text{S}_2$  nanorod.

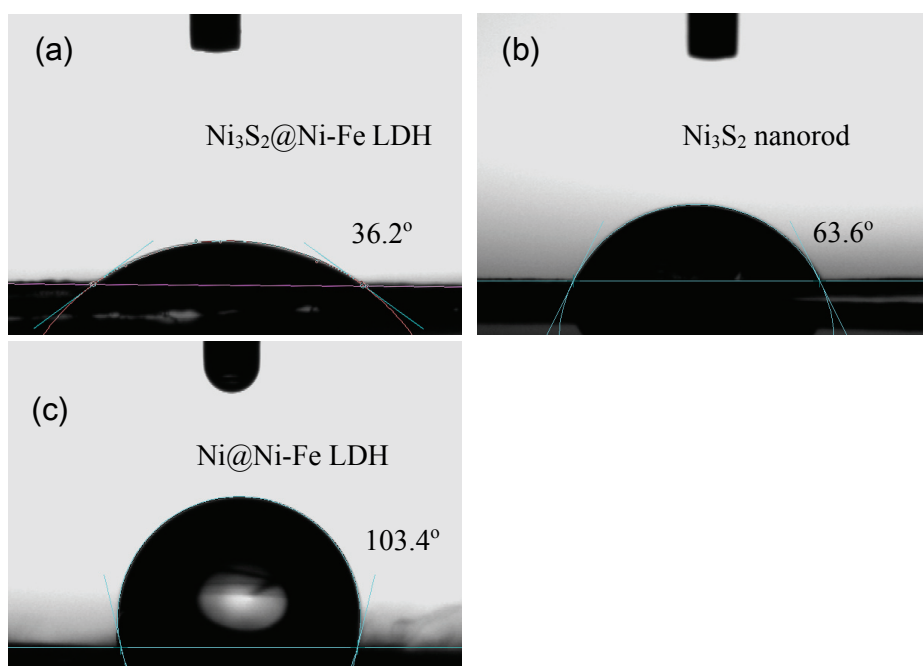

**Fig. S17.** Contact angle of (a)  $\text{Ni}_3\text{S}_2@\text{Ni-Fe LDH}$ , (b)  $\text{Ni}_3\text{S}_2$  nanorod and (c)  $\text{Ni}@\text{Ni-Fe LDH}$ .

**Table S1.** Performance comparison between Ni<sub>3</sub>S<sub>2</sub>@Ni-Fe LDH and recently reported non precious OER catalysts.

| Material                                                                           | Solution | Current collector      | OverPotential @ 10mA/cm <sup>2</sup> mV | Tafel slope | Reference                   |
|------------------------------------------------------------------------------------|----------|------------------------|-----------------------------------------|-------------|-----------------------------|
| Ni <sub>3</sub> S <sub>2</sub> @NiFe LDH                                           | 1M KOH   | Planar, nickel foil    | 245                                     | 35          | This work                   |
|                                                                                    |          | 3D, nickel foam        | 190                                     | 38          |                             |
| CoNi(20:1)-P-NS <sup>1</sup>                                                       | 1M KOH   | Glassy carbon          | 273                                     | 45          | Energy Environ. Sci., 2017  |
|                                                                                    |          | 3D, nickel foam        | 209                                     | 52          |                             |
| Na <sub>0.08</sub> Ni <sub>0.9</sub> Fe <sub>0.1</sub> O <sub>2</sub> <sup>2</sup> | 1M KOH   | Glassy carbon          | 260                                     | 40          | Energy Environ. Sci., 2017  |
| FeNi-LDH/Ti <sub>3</sub> C <sub>2</sub> -MXene <sup>3</sup>                        | 1M KOKH  | Glassy carbon          | 298                                     | 43          | Nano Energy, 2018           |
| CoOx <sup>4</sup>                                                                  | 1M KOH   | Glassy carbon          | 306                                     | 65          | Nano Energy, 2018           |
| CoO <sub>x</sub> /BNG <sup>5</sup>                                                 | 0.1M KOH | Glassy carbon          | 295                                     | 57          | Angew. Chem. Int. Ed., 2017 |
| pc-Ni-Bi@NB <sup>6</sup>                                                           | 1M KOH   | Glassy carbon          | 302                                     | 52          | Angew. Chem. Int. Ed., 2017 |
| Ni <sub>x</sub> Co <sub>1-x</sub> O <sup>7</sup>                                   | 0.5M KOH | Planar, gold           | 350                                     |             | Adv. Funct. Mater. 2017     |
| Fe <sub>3</sub> N/Fe <sub>4</sub> N <sup>8</sup>                                   | 1M KOH   | 3D, nickel foam        | 238                                     | 44.5        | ACS Catalysis 2017          |
| NiO/CoN <sup>9</sup>                                                               | 1M KOH   | Carbon fiber paper     | 300                                     | 35          | ACS Nano, 2017              |
| Fe <sub>1</sub> Co <sub>1</sub> -ONS <sup>10</sup>                                 | 0.1M KOH | Glassy carbon          | 308                                     | 36.8        | Adv. Mater. 2017            |
| NiFe-MOF <sup>11</sup>                                                             | 0.1M KOH | 3D, Ni foam            | 240                                     | 34          | Nat. Commun., 2017          |
| Ni(OH) <sub>2</sub> -Au <sup>12</sup>                                              | 1M KOH   | Glassy carbon          | 270                                     | 35          | J. Am. Chem. Soc., 2016     |
| NiFe-NS <sup>13</sup>                                                              | 1M KOH   | glassy carbon          | 302                                     | 40          | Nat. Commun., 2014          |
| NiFe/NiFe:Pi <sup>14</sup>                                                         | 1M KOH   | 3D, carbon fiber paper | 290                                     | 38          | ACS Catalysis 2017          |
| CoFe LDH-Ar <sup>15</sup>                                                          | 1M KOH   | Glassy carbon          | 266                                     | 37.85       | Angew. Chem. Int. Ed., 2017 |

|                                                                                   |           |                         |     |      |                             |
|-----------------------------------------------------------------------------------|-----------|-------------------------|-----|------|-----------------------------|
| (Co <sub>0.25</sub> Fe <sub>0.48</sub> ) <sub>2</sub> P <sup>16</sup>             | 1M KOH    | Co-Fe-P ribbon          | 270 | 30   | Energy & Environ. Sci. 2016 |
| MoS <sub>2</sub> -Ni <sub>3</sub> S <sub>2</sub> <sup>17</sup>                    | 1M KOH    | 3D, Ni foam             | 249 | 57   | ACS Catalysis 2017          |
| FeNi <sub>8</sub> Co <sub>2</sub> LDH <sup>18</sup>                               | 1M KOH    | 3D, Ni foam             | 230 | 42   | Chem. Commun. 2015          |
| Carbon-coated Ni-Co nanowire <sup>19</sup>                                        | 1M KOH    | Carbon fiber fabric     | 302 | 43.6 | Adv. Energy Mater. 2016     |
| Mono NiTi MMO <sup>20</sup>                                                       | 1M KOH    | Glassy carbon electrode | 320 | 52   | J. Am. Chem. Soc. 2016      |
| βNi(OH) <sub>2</sub> /O-MWCNT <sup>21</sup>                                       | 1M KOH    | Glassy carbon electrode | 270 | 32   | Adv. Energy Mater. 2016     |
| Ni <sub>3</sub> FeN nanoparticle <sup>22</sup>                                    | 1M KOH    | Glassy carbon electrode | 280 |      | Adv. Energy Mater. 2016     |
| Fe <sub>3</sub> O <sub>4</sub> @Co <sub>9</sub> S <sub>8</sub> /rGO <sup>23</sup> | 1M KOH    | Glassy carbon           | 320 | 54.5 | Adv. Funct. Mater. 2016     |
| NiCo LDH <sup>24</sup>                                                            | 0.1 M KOH | 3D, Ni foam             | 420 | 113  | J. Power Sources 2015       |
| NiCo LDH <sup>25</sup>                                                            | 1M KOH    | Carbon paper            | 367 | 40   | Nano Lett. 2015             |
| Fe-N-C/NiFe-LDH <sup>26</sup>                                                     | 0.1M KOH  | Rotating disk electrode | 285 |      | Energy & Environ. Sci. 2016 |
| NiCo <sub>2</sub> S <sub>4</sub> NW/NF <sup>27</sup>                              | 1M KOH    | 3D, Ni foam             | 260 | 40.1 | Adv. Funct. Mater. 2016     |
| NiS <sub>x</sub> <sup>28</sup>                                                    | 1M KOH    | Glassy carbon electrode | 353 | 41   | Chem. Mater. 2016           |

**Table S2.** Electrical elements of Ni<sub>3</sub>S<sub>2</sub> and Ni<sub>3</sub>S<sub>2</sub>@Ni-Fe LDH fitted by the equivalent circuit as shown in the inset of Fig. 5a.

|                                           | $R_s / \Omega$ | $CPE_1 / \text{mF}$ | $R_{ct} / \Omega$ | $CPE_2 / \text{mF}$ | $R_{OER} / \Omega$ |
|-------------------------------------------|----------------|---------------------|-------------------|---------------------|--------------------|
| Ni <sub>3</sub> S <sub>2</sub>            | 0.715          | 270                 | 0.165             | 818                 | 3.516              |
| Ni <sub>3</sub> S <sub>2</sub> @Ni-Fe LDH | 0.612          | 286                 | 0.269             | 486                 | 1.214              |
| Ni@Ni-Fe LDH                              | 0.787          | 11                  | 25.2              | 66                  | 14.2               |

## References

1. X. Xiao, C.-T. He, S. Zhao, J. Li, W. Lin, Z. Yuan, Q. Zhang, S. Wang, L. Dai and D. Yu, *Energy & Environ. Sci.*, 2017, **10**, 893.
2. B. Weng, F. Xu, C. Wang, W. Meng, C. R. Grice and Y. Yan, *Energy & Environ. Sci.*, 2017, **10**, 121.
3. M. Yu, S. Zhou, Z. Wang, J. Zhao and J. Qiu, *Nano Energy*, 2018, **44**, 181.
4. W. Xu, F. Lyu, Y. Bai, A. Gao, J. Feng, Z. Cai and Y. Yin, *Nano Energy*, 2018, **43**, 110.
5. Y. Tong, P. Chen, T. Zhou, K. Xu, W. Chu, C. Wu and Y. Xie, *Angew. Chem. Int. Ed.*, 2017, **56**, 7121.
6. W.-J. Jiang, S. Niu, T. Tang, Q.-H. Zhang, X.-Z. Liu, Y. Zhang, Y.-Y. Chen, J.-H. Li, L. Gu, L.-J. Wan and J.-S. Hu, *Angew. Chem. Int. Ed.*, 2017, **56**, 6572.
7. K. Fominykh, G. C. Tok, P. Zeller, H. Hajiyani, T. Miller, M. Döblinger, R. Pentcheva, T. Bein and D. Fattakhova-Rohlfing, *Adv. Funct. Mater.*, 2017, **27**, 1605121.
8. F. Yu, H. Zhou, Z. Zhu, J. Sun, R. He, J. Bao, S. Chen and Z. Ren, *ACS Catalysis*, 2017, **7**, 2052.
9. J. Yin, Y. Li, F. Lv, Q. Fan, Y.-Q. Zhao, Q. Zhang, W. Wang, F. Cheng, P. Xi and S. Guo, *ACS Nano*, 2017, **11**, 2275.
10. L. Zhuang, L. Ge, Y. Yang, M. Li, Y. Jia, X. Yao and Z. Zhu, *Adv. Mater.*, 2017, **29**, 1606793.
11. J. Duan, S. Chen and C. Zhao, *Nat. Commun.*, 2017, **8**, 15341.
12. G. Liu, P. Li, G. Zhao, X. Wang, J. Kong, H. Liu, H. Zhang, K. Chang, X. Meng, T. Kako and J. Ye, *J. Am. Chem. Soc.*, 2016, **138**, 9128.
13. F. Song and X. Hu, *Nat. Commun.*, 2014, **5**, 4477.

14. Y. Li and C. Zhao, *ACS Catalysis*, 2017, **7**, 2535.
15. Y. Wang, Y. Zhang, Z. Liu, C. Xie, S. Feng, D. Liu, M. Shao and S. Wang, *Angew. Chem. Int. Ed.*, 2017, **56**, 5867.
16. Y. Tan, H. Wang, P. Liu, Y. Shen, C. Cheng, A. Hirata, T. Fujita, Z. Tang and M. Chen, *Energy & Environ. Sci.*, 2016, **9**, 2257.
17. Y. Yang, K. Zhang, H. Lin, X. Li, H. C. Chan, L. Yang and Q. Gao, *ACS Catalysis*, 2017, **7**, 2357.
18. X. Long, S. Xiao, Z. Wang, X. Zheng and S. Yang, *Chem. Commun.*, 2015, **51**, 1120.
19. S.-H. Bae, J.-E. Kim, H. Randriamahazaka, S.-Y. Moon, J.-Y. Park and I.-K. Oh, *Adv. Energy Mater.*, 2016, DOI: 10.1002/aenm.201601492, 1601492.
20. Y. Zhao, X. Jia, G. Chen, L. Shang, G. I. N. Waterhouse, L.-Z. Wu, C.-H. Tung, D. O'Hare and T. Zhang, *J. Am. Chem. Soc.*, 2016, **138**, 6517.
21. L. Wang, H. Chen, Q. Daniel, L. Duan, B. Philippe, Y. Yang, H. Rensmo and L. Sun, *Adv. Energy Mater.*, 2016, **6**, 1600516.
22. X. Jia, Y. Zhao, G. Chen, L. Shang, R. Shi, X. Kang, G. I. N. Waterhouse, L.-Z. Wu, C.-H. Tung and T. Zhang, *Adv. Energy Mater.*, 2016, **6**, 1502585.
23. J. Yang, G. Zhu, Y. Liu, J. Xia, Z. Ji, X. Shen and S. Wu, *Adv. Funct. Mater.*, 2016, **26**, 4712.
24. J. Jiang, A. Zhang, L. Li and L. Ai, *J. Power Sources*, 2015, **278**, 445.
25. H. Liang, F. Meng, M. Cabán-Acevedo, L. Li, A. Forticaux, L. Xiu, Z. Wang and S. Jin, *Nano Lett.*, 2015, **15**, 1421.
26. S. Dresp, F. Luo, R. Schmack, S. Kuhl, M. Gliech and P. Strasser, *Energy & Environ. Sci.*, 2016, **9**, 2020.
27. A. Sivanantham, P. Ganesan and S. Shanmugam, *Adv. Funct. Mater.*, 2016, **26**, 4661.
28. H. Li, Y. Shao, Y. Su, Y. Gao and X. Wang, *Chem. Mater.*, 2016, **28**, 1155.
